# Supplementary material for: Human Wild-Type α-Synuclein Drives Progressive Tau Pathology in a Disease-Relevant Mouse Model of Synucleinopathy
Source: Research Square preprint supplement (doi:10.21203/rs.3.rs-8166445/v1), 2025-12-03

**Supplementary Figure – Full Uncropped Gels and Blots**

Uncropped western blot membranes used to prepare **Fig. 4A.**


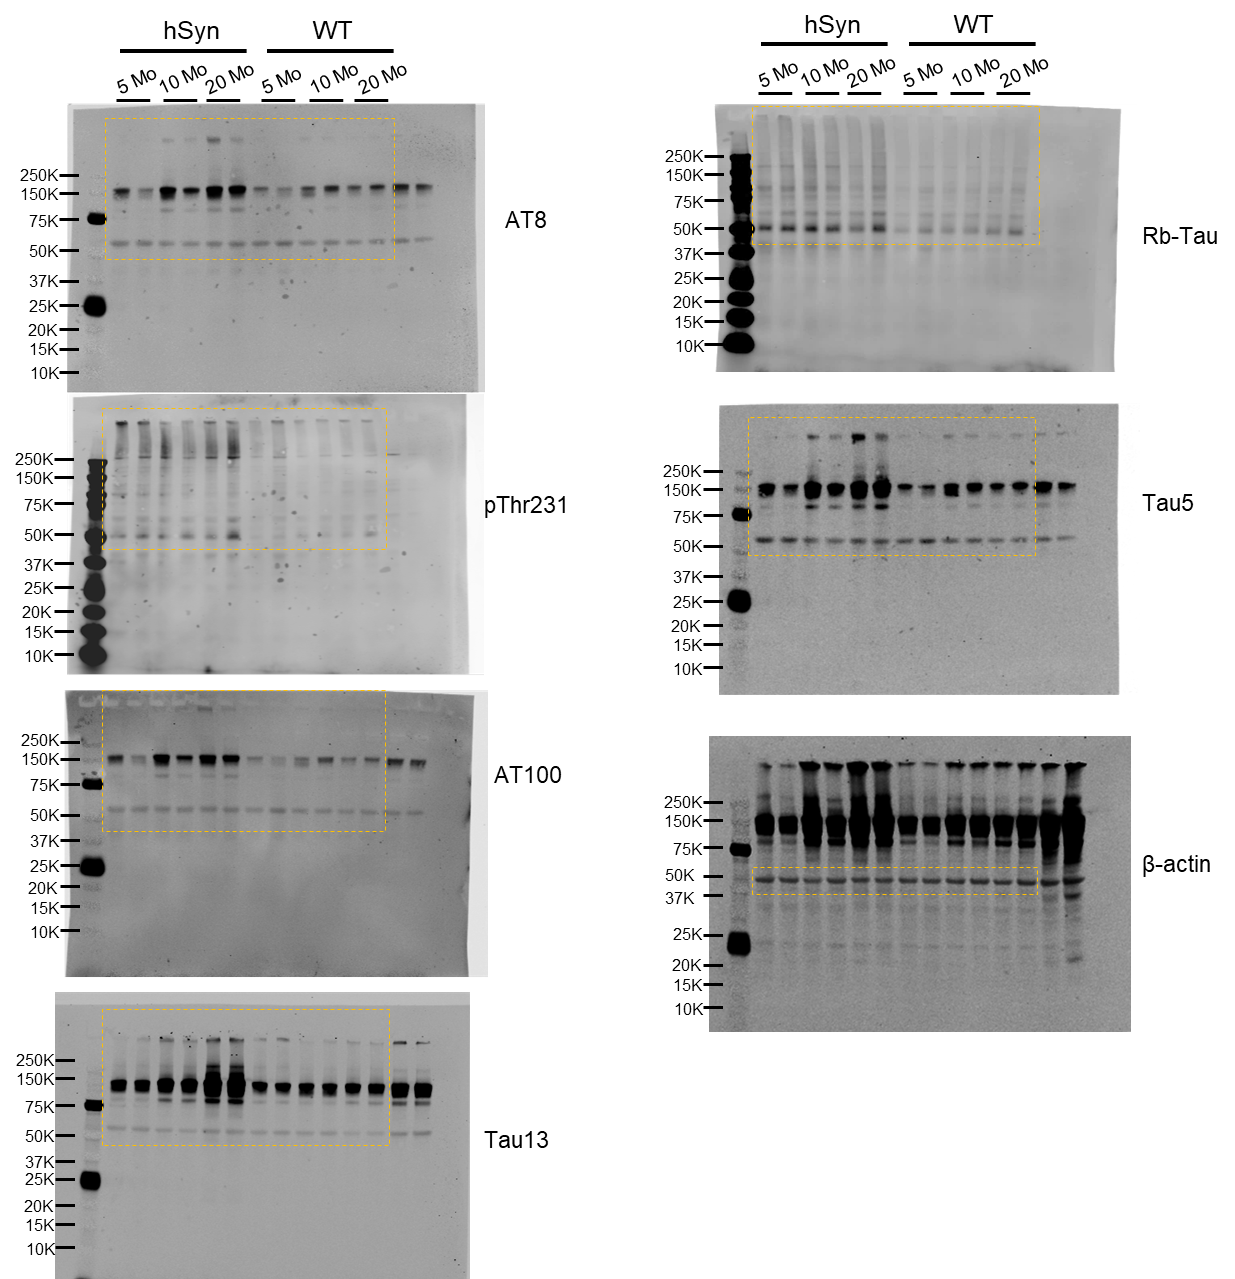


Uncropped western blot membranes used to prepare **Fig. 5B.**


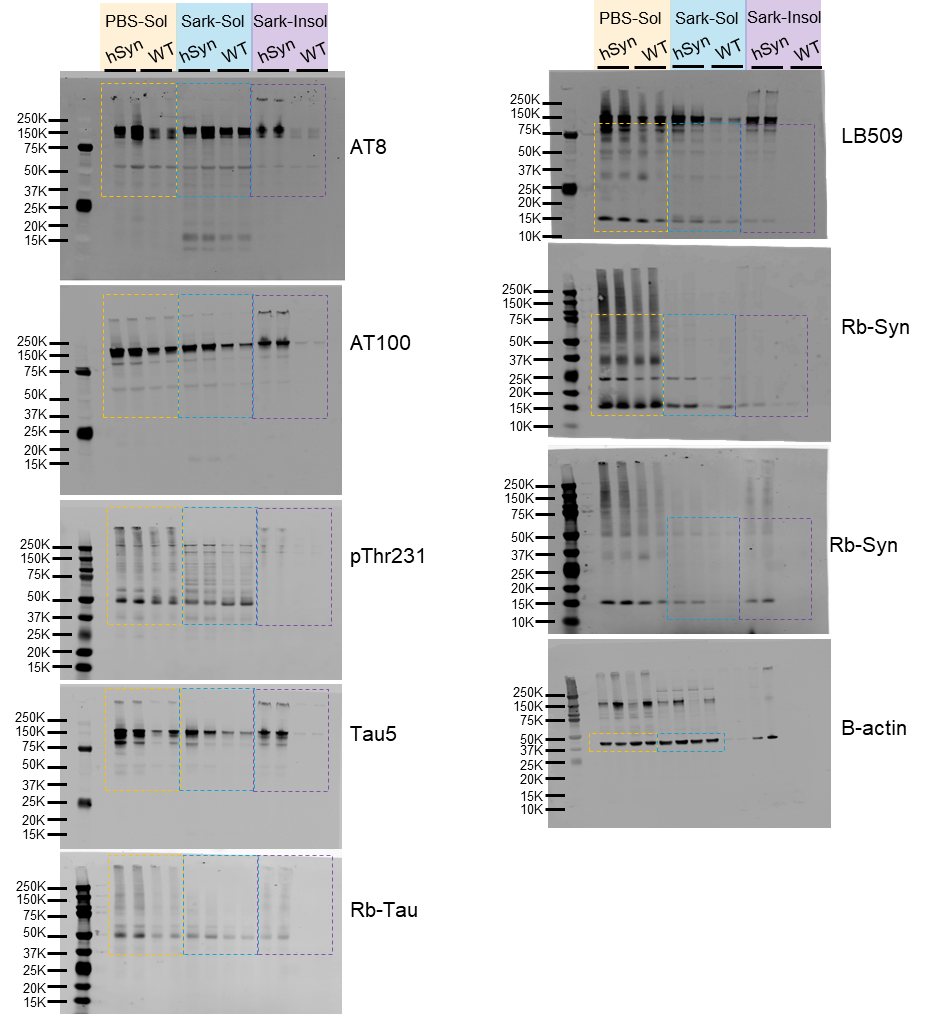


Uncropped Filter trap membranes used to prepare **Fig. 5C.**


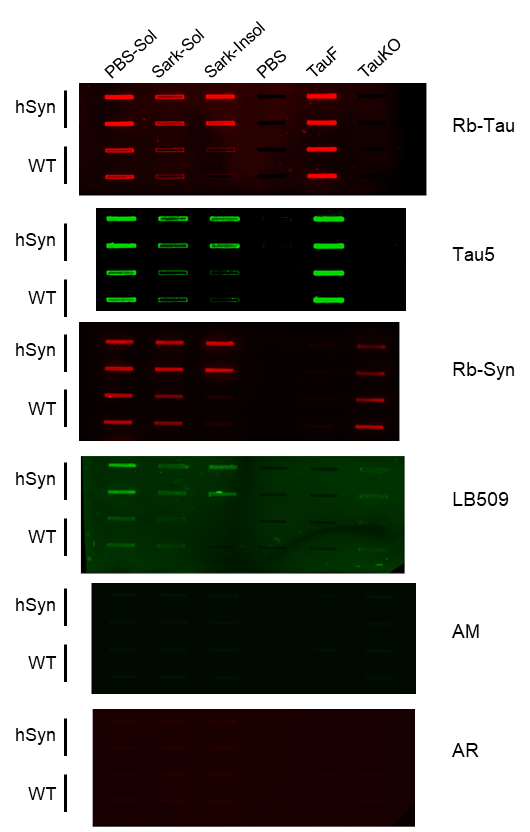


Uncropped Western blot membranes used to prepare supplementary **Fig. S1A.**


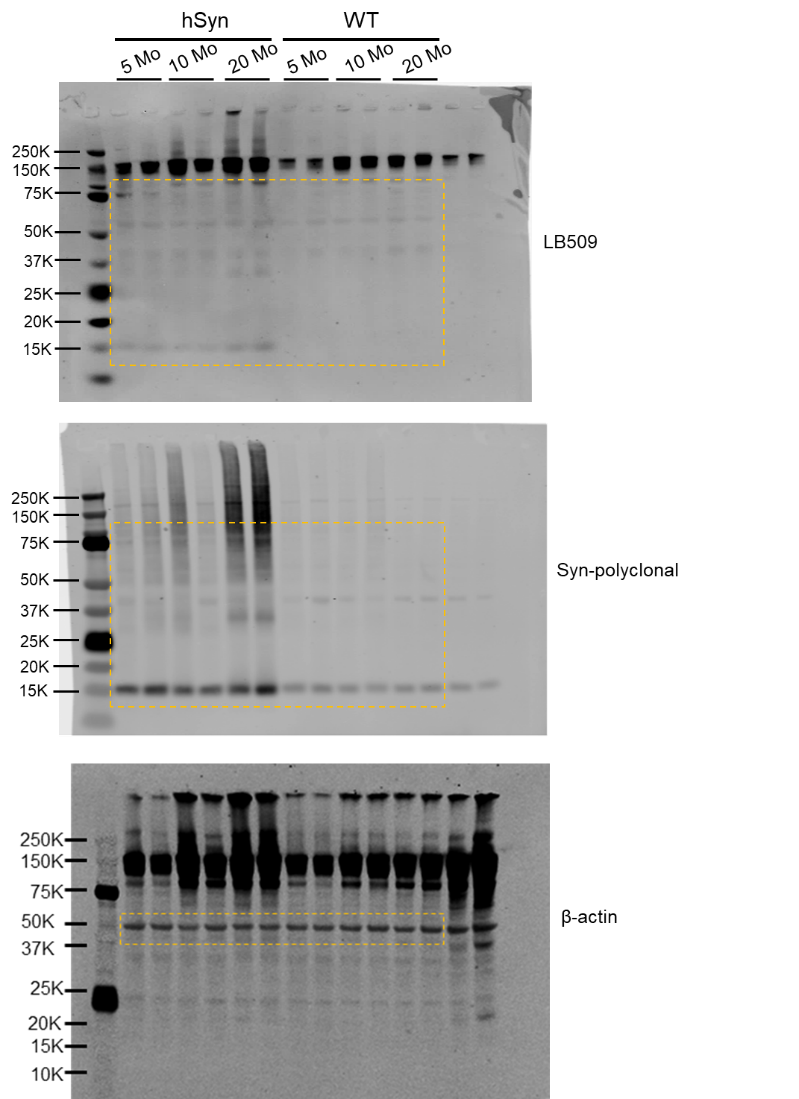

Supplement: Supplementary file 2 [file 60b2121f7b5a359a248f08f6.docx]
